# Supplementary material
Source: PubMed Central journal article supplement (PMC2925037)
Supplement: NIHMS225480-supplement-1_si_001.pdf [file NIHMS225480-supplement-1_si_001.pdf]

## Supporting Information

### **Seed-Mediated Synthesis of Ag Nanocubes with Controllable Edge Lengths in the Range of 30-200 nm and Comparison of Their Optical Properties**

Qiang Zhang,<sup>†,‡,§</sup> Weiyang Li,<sup>†,§</sup> Christine Moran,<sup>†</sup> Jie Zeng,<sup>†</sup> Jingyi Chen,<sup>†</sup>  
Long-Ping Wen,<sup>‡</sup> and Younan Xia<sup>†,\*</sup>

<sup>†</sup>*Department of Biomedical Engineering, Washington University, St. Louis, Missouri 63130*

<sup>‡</sup>*Hefei National Laboratory for Physical Sciences at the Microscale, University of Science  
and Technology of China, Hefei, Anhui 230027, P. R. China*

<sup>§</sup>These two authors contributed equally to this work.

\*Corresponding author: xia@biomed.wustl.edu

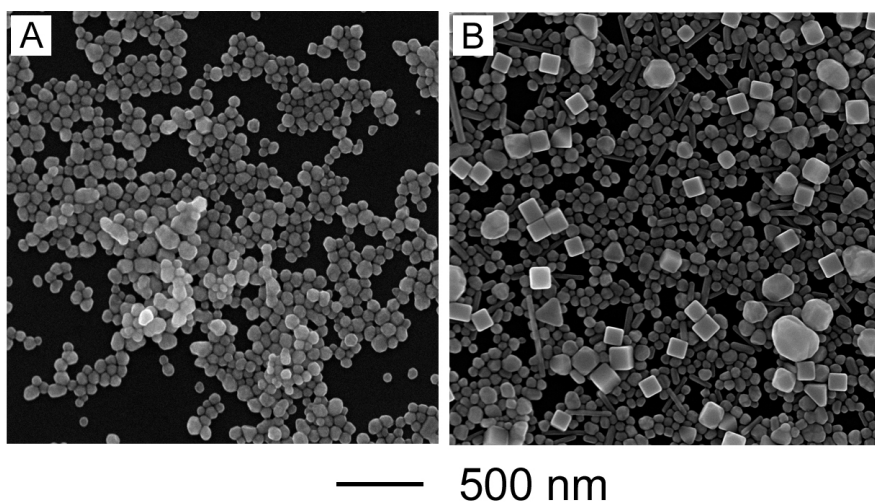

**Figure S1.** SEM images of Ag nanoparticles obtained when (A)  $\text{CF}_3\text{COOAg}$  instead of  $\text{AgNO}_3$  was used for the seed-mediated growth and (B) a trace amount (0.125 mL, 3 mM) of HCl was introduced into the synthesis shown in (A).

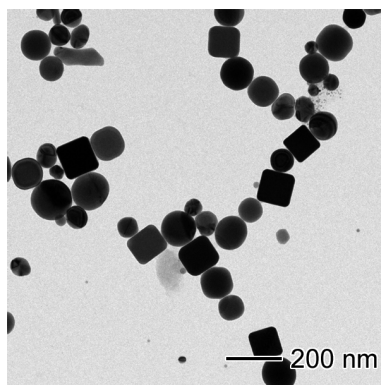

**Figure S2.** TEM image of Ag nanoparticles obtained by adding 0.93 mM HNO<sub>3</sub> after AgNO<sub>3</sub> had been added for 20 min in a standard synthesis.

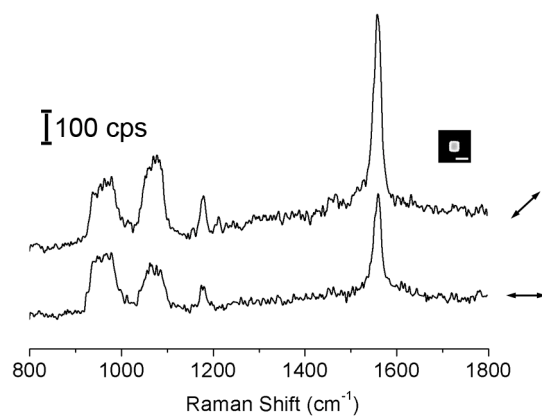

**Figure S3.** SERS spectra recorded from 82-nm Ag cubes under two laser polarization directions: along an edge (bottom trace) and along a face diagonal (top trace). The scale bars in the insets correspond to 100 nm. cps=counts per second.
